# Supplementary material for: A Novel Beta-Glucosidase Gene for Plant Type Was Identified by Genome-Wide Association Study and Gene Co-Expression Analysis in Widespread Bermudagrass
Source: MDPI journal article supplement (doi:10.3390/ijms231911432), 2022-09-28
Supplement: s1 [file s1]

## Supplementary materials

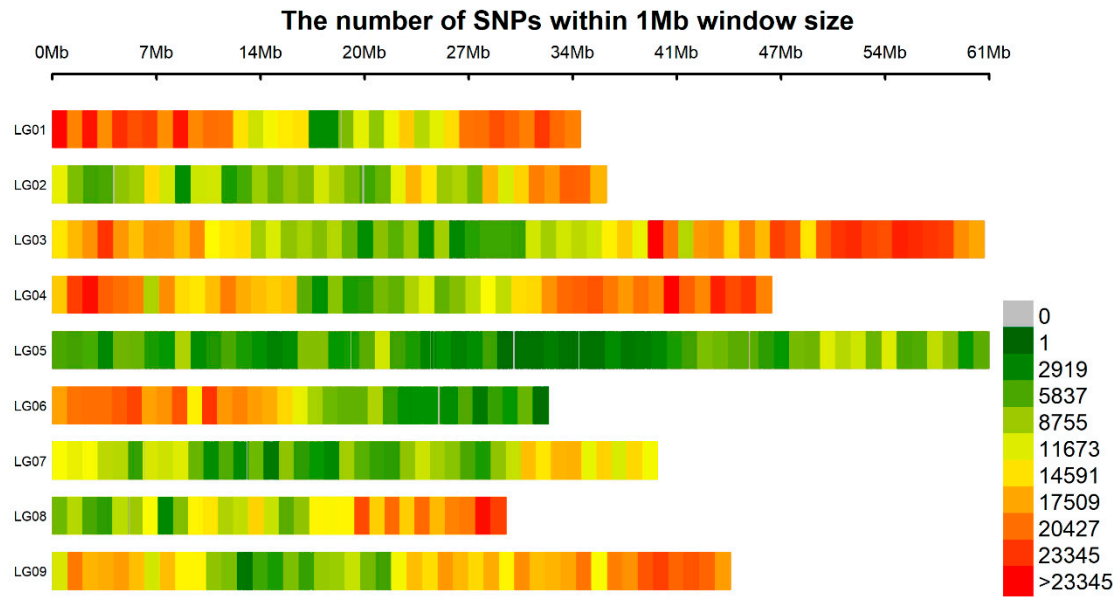

**Figure S1.** The number of SNPs in chromosomes within 1Mb window size.

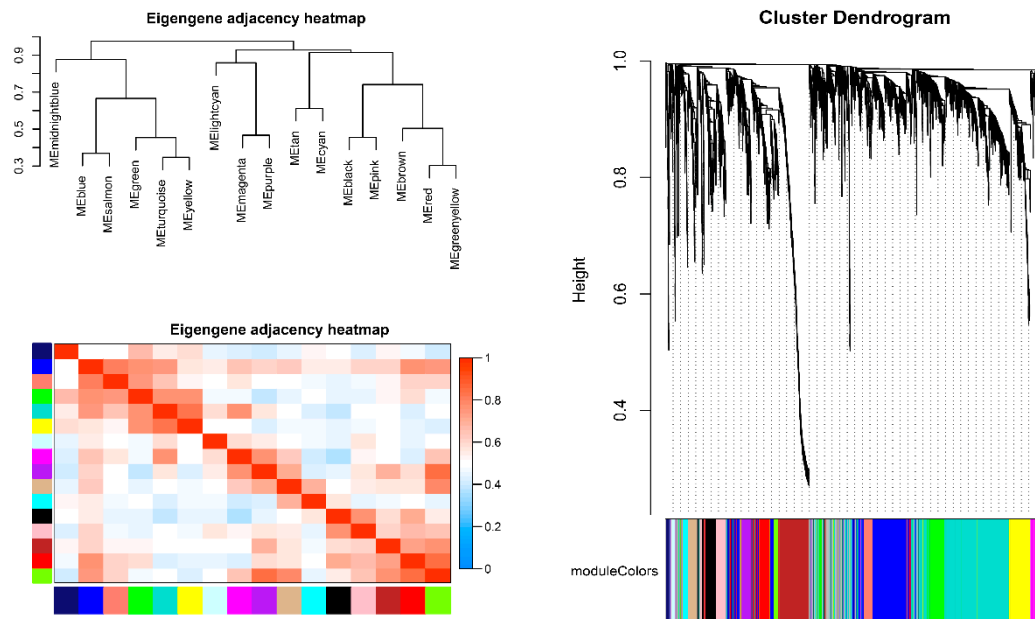

**Figure S2.** The topological matrix and hierarchical clustering tree of WGCNA.

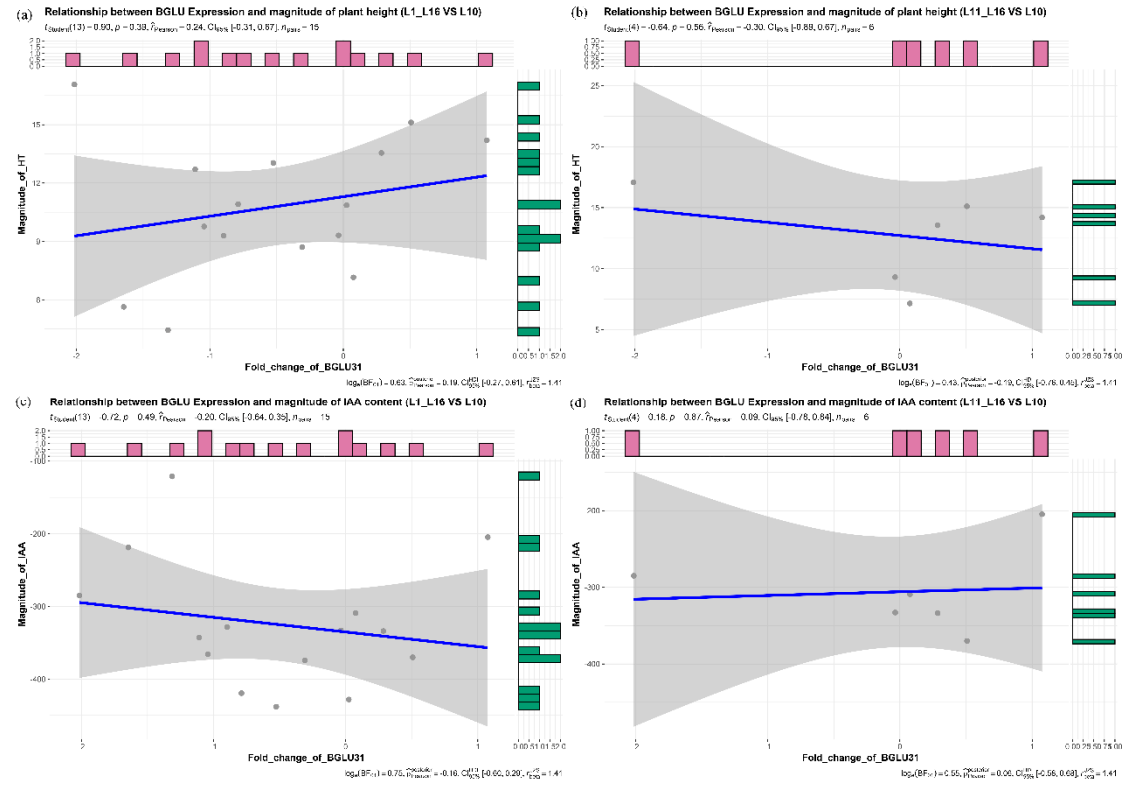

**Figure S3.** Correlation coefficient analysis between plant traits and BGLU31 expression. (a) Relationship between BGLU Expression and magnitude of plant height (L1\_L16 VS L10). (b) Relationship between BGLU Expression and magnitude of plant height (L11\_L16 VS L10). (c) Relationship between BGLU Expression and magnitude of IAA content (L1\_L16 VS L10). (d) Relationship between BGLU Expression and magnitude of IAA content (L11\_L16 VS L10).

[illegible]

analysis of BGLU gene from different plants.

Table S1. Geographical locations, plant height and IAA content of diverse bermudagrass

| Region           | Latitude     | Sample  | HT     | IAA       |
|------------------|--------------|---------|--------|-----------|
| Subtropical zone | 22°35'40"    | L1      | 20.43  | 266.92438 |
|                  | 22°51'48"    | L2      | 17.49  | 244.04445 |
|                  | 24°10'31"    | L3      | 20.76  | 171.6514  |
|                  | 25°05'29"    | L4      | 18.64  | 190.29881 |
|                  | 26°03'49"    | L5      | 18.58  | 181.54994 |
|                  | 27°00'59"    | L6      | 17.01  | 281.34448 |
|                  | 28°09'14"    | L7      | 16.42  | 235.61128 |
|                  | 29°28'32"    | L8      | 13.36  | 390.85805 |
|                  | 30°25'48"    | L9      | 12.16  | 488.7188  |
|                  | 31°18'59"    | L10     | 7.72   | 609.71927 |
| Mesotherm zone   | 32°08'38"    | L11     | 14.87  | 300.4336  |
|                  | 33°09'47"    | L12     | 17.03  | 276.79077 |
|                  | 34°00'30"    | L13     | 21.27  | 275.84688 |
|                  | 34°54'04"    | L14     | 22.84  | 239.66685 |
|                  | 35°29'26"    | L15     | 21.92  | 405.10552 |
|                  | 36°18'40"    | L16     | 24.79  | 324.74452 |
| Coefficient      | Total region | L1-L16  | 0.156  | 0.410     |
|                  | Subtropics   | L1-L10  | -0.890 | 0.792     |
|                  | Mesotherm    | L11-L16 | 0.957  | 0.387     |

Table S2. Detailed data of GO analysis result of DEGs.

| GO ID      | Description                                | DEGs | All Gene | pvalue    | p.adjust  |
|------------|--------------------------------------------|------|----------|-----------|-----------|
| GO:0044710 | single-organism metabolic process          | 390  | 2070     | 1.07E-07  | 0.0001002 |
| GO:0055114 | oxidation-reduction process                | 221  | 1167     | 0.0001239 | 0.0165487 |
| GO:1901615 | organic hydroxy compound metabolic process | 8    | 12       | 8.04E-05  | 0.0150624 |
| GO:0006082 | organic acid metabolic process             | 70   | 307      | 0.0002416 | 0.0208166 |
| GO:0043436 | oxoacid metabolic process                  | 70   | 306      | 0.000218  | 0.0208166 |
| GO:0019752 | carboxylic acid metabolic process          | 70   | 300      | 0.0001155 | 0.0165487 |
| GO:0044281 | small molecule metabolic process           | 106  | 452      | 1.55E-06  | 0.0007257 |
| GO:0006520 | cellular amino acid metabolic process      | 43   | 153      | 2.97E-05  | 0.0092672 |
| GO:0043038 | amino acid activation                      | 21   | 66       | 0.000546  | 0.0283608 |
| GO:0006334 | nucleosome assembly                        | 10   | 20       | 0.0002822 | 0.0208166 |
| GO:0006323 | DNA packaging                              | 10   | 21       | 0.0004655 | 0.0272037 |
| GO:0071824 | protein-DNA complex subunit organization   | 11   | 23       | 0.0002299 | 0.0208166 |
| GO:0031497 | chromatin assembly                         | 10   | 20       | 0.0002822 | 0.0208166 |
| GO:0006334 | nucleosome assembly                        | 10   | 20       | 0.0002822 | 0.0208166 |
| GO:0034728 | nucleosome organization                    | 11   | 21       | 8.05E-05  | 0.0150624 |
| GO:0006066 | alcohol metabolic process                  | 7    | 11       | 0.0003562 | 0.023791  |
| GO:1901615 | organic hydroxy compound metabolic process | 8    | 12       | 8.04E-05  | 0.0150624 |
| GO:0003824 | catalytic activity                         | 1005 | 6224     | 1.70E-06  | 0.0009385 |
| GO:0048037 | cofactor binding                           | 78   | 339      | 2.52E-05  | 0.0057297 |
| GO:0050662 | coenzyme binding                           | 61   | 250      | 3.11E-05  | 0.0057297 |

Table S3. Phenotypic characterizations of *bglu11* mutant and wild type of Arabidopsis

|                     | WT         | M1        | M2        |
|---------------------|------------|-----------|-----------|
| Height of rosette   | 1.99±0.09  | 1.81±0.05 | 1.63±0.04 |
| Diameter of rosette | 5.26±0.03  | 4.73±0.05 | 3.12±0.07 |
| Plant Height        | 16.38±0.55 | 7.57±0.24 | 9.75±0.12 |
